# Supplementary material for: Suppression of RAF/MEK or PI3K synergizes cytotoxicity of receptor tyrosine kinase inhibitors in glioma tumor-initiating cells
Source: PubMed Central journal article supplement (PMC4746796; doi:10.1186/s12967-016-0803-2), 2016-02-09

# Supplementary figure 1

**A**

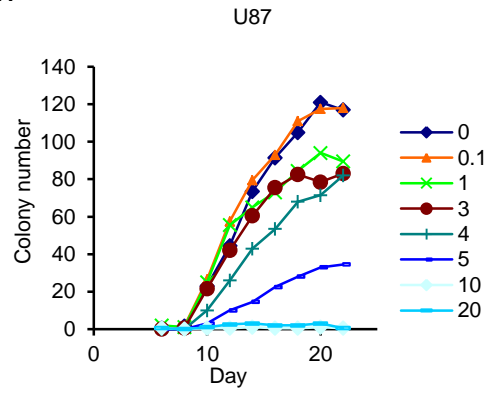

**B**

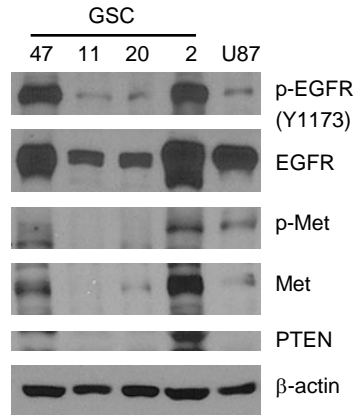

Supplement: 12967_2016_803_MOESM2_ESM.pdf [file 12967_2016_803_MOESM2_ESM.pdf]
